# Supplementary material for: Pathological consequences of MICU1 mutations on mitochondrial calcium signalling and bioenergetics
Source: PubMed Central journal article supplement (PMC5424885; doi:10.1016/j.bbamcr.2017.01.015), 2017-06
Supplement: mmc1.pdf [file mmc1.pdf]

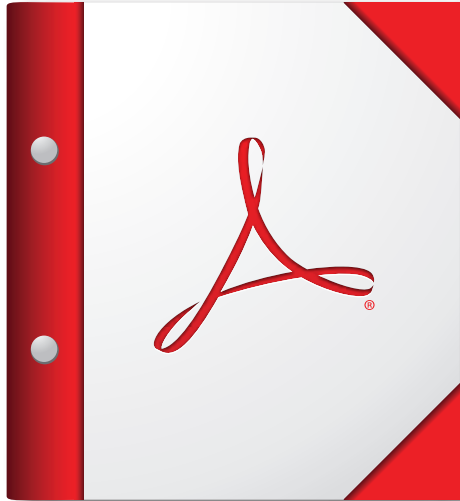

**For the best experience, open this PDF portfolio in  
Acrobat 9 or Adobe Reader 9, or later.**

[Get Adobe Reader Now!](#)
